# Supplementary material for: A 2D low-buckled hexagonal honeycomb Weyl-point spin-gapless semiconductor family with the quantum anomalous Hall effect
Source: Royal Society of Chemistry journal article supplement (doi:10.1039/d4nr00120f), 2024-01-01
Supplement: d4nr00120f1.pdf [file d4nr00120f1.pdf]

## Supporting Information

### 2D low-buckled hexagonal honeycomb Weyl-point spin-gapless semiconductor family with quantum anomalous Hall effect

Weihua Zhang,<sup>1</sup> Jie Zhang,<sup>1</sup> Shoubing Ding,<sup>1,\*</sup> Zhenxiang Cheng,<sup>2,\*</sup> Zhimin Wu<sup>1,\*</sup>

<sup>1</sup>*School of Physics and Electronic Engineering, Chongqing Normal University, Chongqing 401331, China*

<sup>2</sup>*Institute for Superconducting and Electronic Materials (ISEM), University of Wollongong, Wollongong 2500, Australia.*

\*Corresponding author: [shoubingding@cqnu.edu.cn](mailto:shoubingding@cqnu.edu.cn);

[cheng@uow.edu.au](mailto:cheng@uow.edu.au);

[zmwu@cqnu.edu.cn](mailto:zmwu@cqnu.edu.cn)

TABLE. S1. The Lattice constants  $a$ , bond lengths  $l_{\text{Li-Y}}$  and  $l_{\text{X-Y}}$  and cohesive energies  $E_c$  of LiXY monolayers.  $E_{\text{g-slab}}$  and  $E_{\text{g-bulk}}$  are bandgaps of LiXY monolayers and bulk LiXY, respectively.

| Systems | $A$<br>(Å) | $l_{\text{Li-Y}}$<br>(Å) | $l_{\text{X-Y}}$<br>(Å) | $E_c$<br>(eV/atom) | $E_{\text{g-slab}}$<br>(eV) | $E_{\text{g-bulk}}$<br>(eV) <sup>1</sup> |
|---------|------------|--------------------------|-------------------------|--------------------|-----------------------------|------------------------------------------|
| LiMgP   | 4.15       | 2.56                     | 2.49                    | 2.63               | 1.78                        | 1.54                                     |
| LiMgAs  | 4.29       | 2.64                     | 2.58                    | 2.44               | 1.57                        | 1.37                                     |
| LiZnP   | 4.00       | 2.53                     | 2.34                    | 2.36               | 1.61                        | 1.35                                     |
| LiZnAs  | 4.16       | 2.61                     | 2.44                    | 2.15               | 1.09                        | 0.49                                     |
| LiCdP   | 4.27       | 2.59                     | 2.56                    | 2.12               | 1.21                        | 0.56                                     |
| LiCdAs  | 4.42       | 2.66                     | 2.66                    | 1.96               | 0.81                        | 0                                        |

<sup>1</sup> S. Kacimi, H. Mehnane and A. Zaoui, J. Alloys Compd., 2014, 587, 451-458.  
<https://doi.org/10.1016/j.jallcom.2013.10.046>

TABLE. S2. The Energies of ferromagnetic configuration for  $\text{Li}_{12}\text{X}_{10}\text{Cr}_2\text{Y}_{12}$  monolayers  $E_{\text{FM}}$  and the energy differences between ferromagnetic and antiferromagnetic configurations  $\Delta E$ .

| Systems                                                 | $E_{\text{FM}}$<br>(eV) | $\Delta E_{(\text{AFM-1})\text{-FM}}$<br>(meV) | $\Delta E_{(\text{AFM-2})\text{-FM}}$<br>(meV) | $\Delta E_{(\text{AFM-3})\text{-FM}}$<br>(meV) |
|---------------------------------------------------------|-------------------------|------------------------------------------------|------------------------------------------------|------------------------------------------------|
| $\text{Li}_{12}\text{Mg}_{10}\text{Cr}_2\text{P}_{12}$  | -265.38                 | 480.07                                         | 90.02                                          | 26.95                                          |
| $\text{Li}_{12}\text{Mg}_{10}\text{Cr}_2\text{As}_{12}$ | -246.74                 | 457.48                                         | 88.82                                          | 26.47                                          |
| $\text{Li}_{12}\text{Zn}_{10}\text{Cr}_2\text{P}_{12}$  | -250.58                 | 531.48                                         | 87.15                                          | 27.92                                          |
| $\text{Li}_{12}\text{Zn}_{10}\text{Cr}_2\text{As}_{12}$ | -230.52                 | 451.67                                         | 82.37                                          | 25.83                                          |
| $\text{Li}_{12}\text{Cd}_{10}\text{Cr}_2\text{P}_{12}$  | -235.50                 | 468.03                                         | 79.60                                          | 26.57                                          |
| $\text{Li}_{12}\text{Cd}_{10}\text{Cr}_2\text{As}_{12}$ | -218.83                 | 391.43                                         | 72.12                                          | 23.24                                          |

TABLE. S3. Magnetic exchange coupling parameters  $J_2^{\alpha}$  and  $J_3^{\alpha}$ .

| Systems                                                 | $J_2^x$<br>(meV) | $J_2^y$<br>(meV) | $J_2^z$<br>(meV) | $J_3^x$<br>(meV) | $J_3^y$<br>(meV) | $J_3^z$<br>(meV) |
|---------------------------------------------------------|------------------|------------------|------------------|------------------|------------------|------------------|
| $\text{Li}_{12}\text{Mg}_{10}\text{Cr}_2\text{P}_{12}$  | -0.23            | -0.23            | -0.23            | -0.08            | -0.08            | -0.08            |
| $\text{Li}_{12}\text{Mg}_{10}\text{Cr}_2\text{As}_{12}$ | -0.19            | -0.19            | -0.20            | -0.10            | -0.10            | -0.10            |
| $\text{Li}_{12}\text{Zn}_{10}\text{Cr}_2\text{P}_{12}$  | -0.32            | -0.32            | -0.32            | -0.06            | -0.06            | -0.06            |
| $\text{Li}_{12}\text{Zn}_{10}\text{Cr}_2\text{As}_{12}$ | -0.21            | -0.21            | -0.22            | -0.10            | -0.10            | -0.10            |
| $\text{Li}_{12}\text{Cd}_{10}\text{Cr}_2\text{P}_{12}$  | -0.24            | -0.24            | -0.23            | -0.12            | -0.12            | -0.12            |
| $\text{Li}_{12}\text{Cd}_{10}\text{Cr}_2\text{As}_{12}$ | -0.17            | -0.17            | -0.17            | -0.12            | -0.12            | -0.11            |

TABLE. S4. Atomic and total magnetic moments for  $\text{Li}_{12}\text{X}_{10}\text{Cr}_2\text{Y}_{12}$  monolayers.

| Systems                                                 | Li<br>( $\mu_B$ ) | X<br>( $\mu_B$ ) | Cr<br>( $\mu_B$ ) | Y (nearest of Cr / others)<br>( $\mu_B$ ) | Total<br>( $\mu_B$ ) |
|---------------------------------------------------------|-------------------|------------------|-------------------|-------------------------------------------|----------------------|
| $\text{Li}_{12}\text{Mg}_{10}\text{Cr}_2\text{P}_{12}$  | 0                 | 0.01             | 3.57              | -0.05 / 0                                 | 6.91                 |
| $\text{Li}_{12}\text{Mg}_{10}\text{Cr}_2\text{As}_{12}$ | 0                 | 0.01             | 3.67              | -0.06 / 0                                 | 7.06                 |
| $\text{Li}_{12}\text{Zn}_{10}\text{Cr}_2\text{P}_{12}$  | 0                 | 0.01             | 3.54              | -0.05 / 0                                 | 6.94                 |
| $\text{Li}_{12}\text{Zn}_{10}\text{Cr}_2\text{As}_{12}$ | 0                 | 0.01             | 3.64              | -0.05 / 0                                 | 7.09                 |
| $\text{Li}_{12}\text{Cd}_{10}\text{Cr}_2\text{P}_{12}$  | 0                 | 0.01             | 3.53              | -0.06 / 0                                 | 6.94                 |
| $\text{Li}_{12}\text{Cd}_{10}\text{Cr}_2\text{As}_{12}$ | 0                 | 0.01             | 3.63              | -0.06 / 0                                 | 7.08                 |

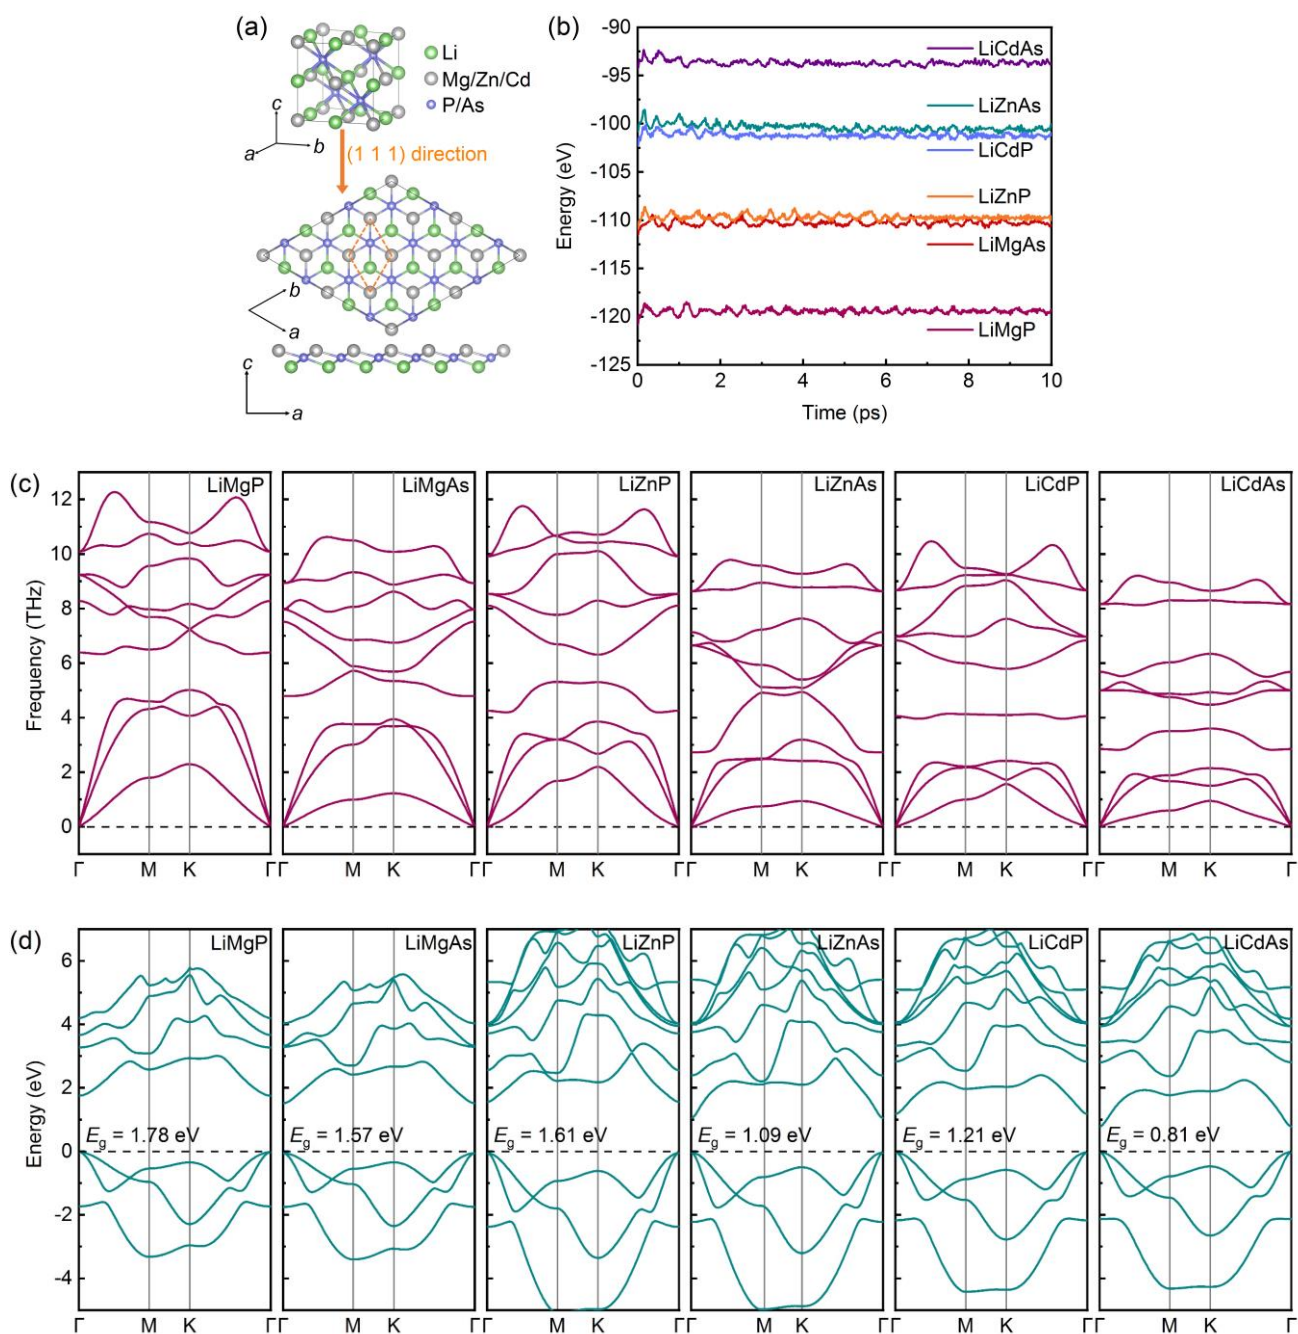

FIG. S1. (a) Top and side view of  $\text{LiXY}$  ( $X = \text{Mg, Zn, Cd}$ ;  $Y = \text{P, As}$ ) monolayers with lattice vectors  $a$ ,  $b$  and  $c$ . (b) Total potential energy fluctuations of  $\text{LiXY}$  monolayers during AIMD simulations at 300 K. (c) Phonon spectra of  $\text{LiXY}$  monolayers. (d) Electronic band structures of  $\text{LiXY}$  monolayers.

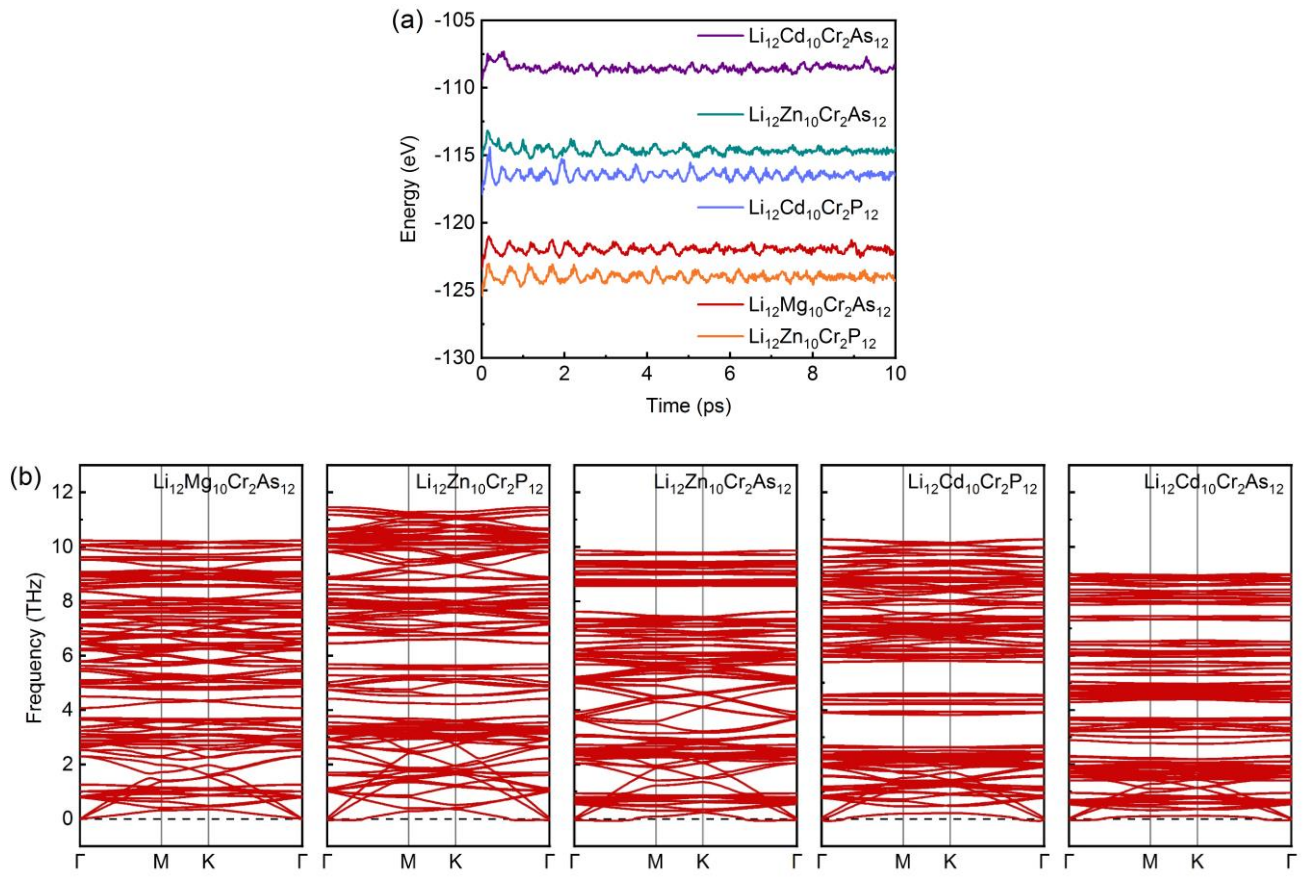

FIG. S2. (a) Total potential energy fluctuations of  $\text{Li}_{12}\text{X}_{10}\text{Cr}_2\text{Y}_{12}$  ( $X = \text{Mg, Zn, Cd}; Y = \text{P, As}$ ) monolayers during AIMD simulations at 300 K. (b) Phonon spectra of  $\text{Li}_{12}\text{X}_{10}\text{Cr}_2\text{Y}_{12}$  monolayers.

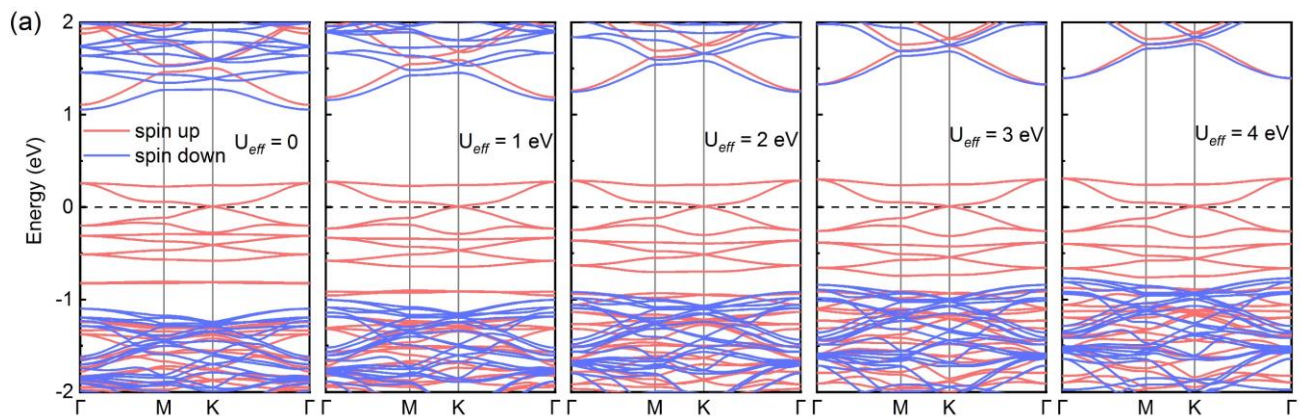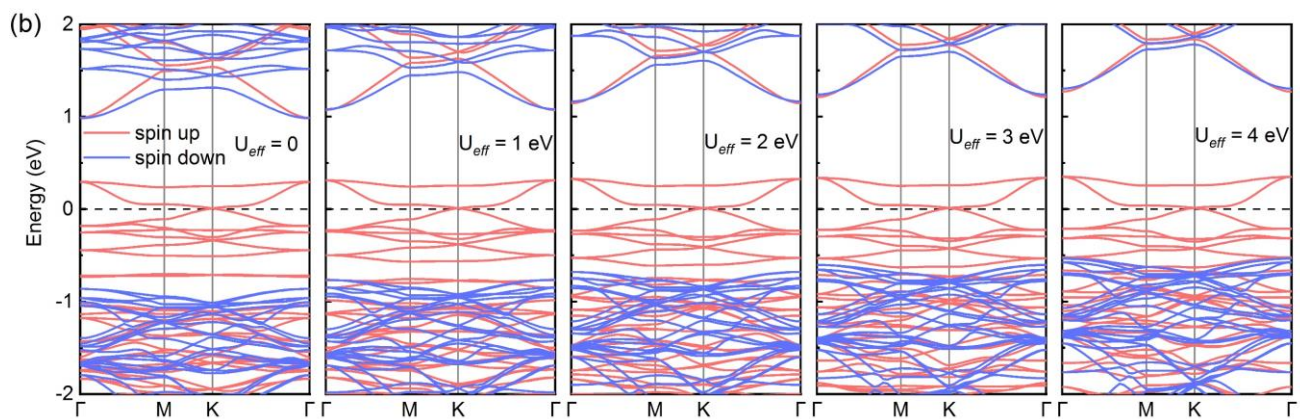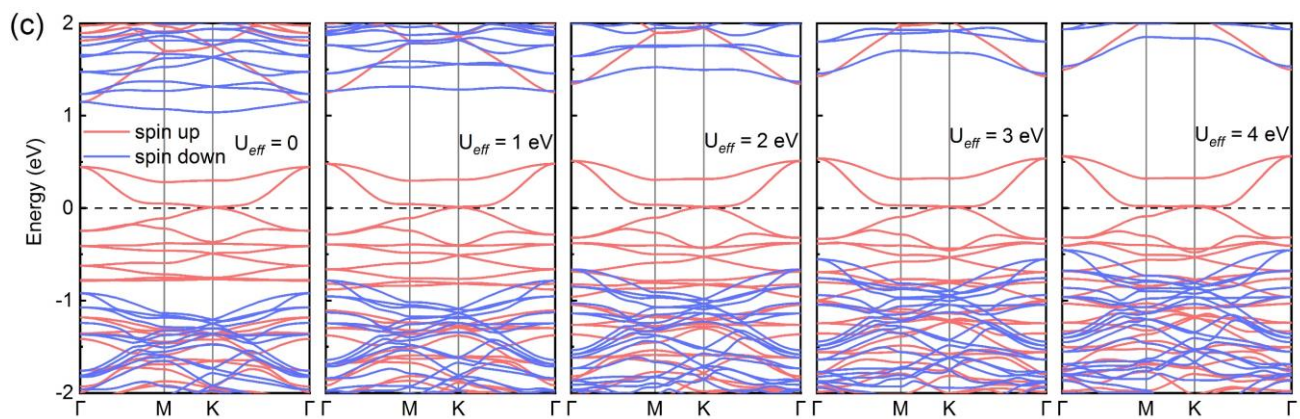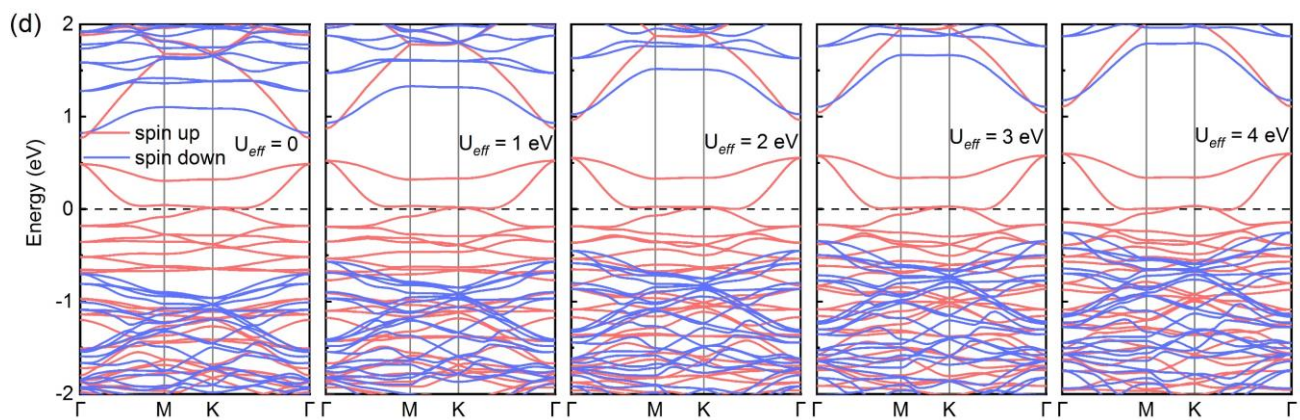

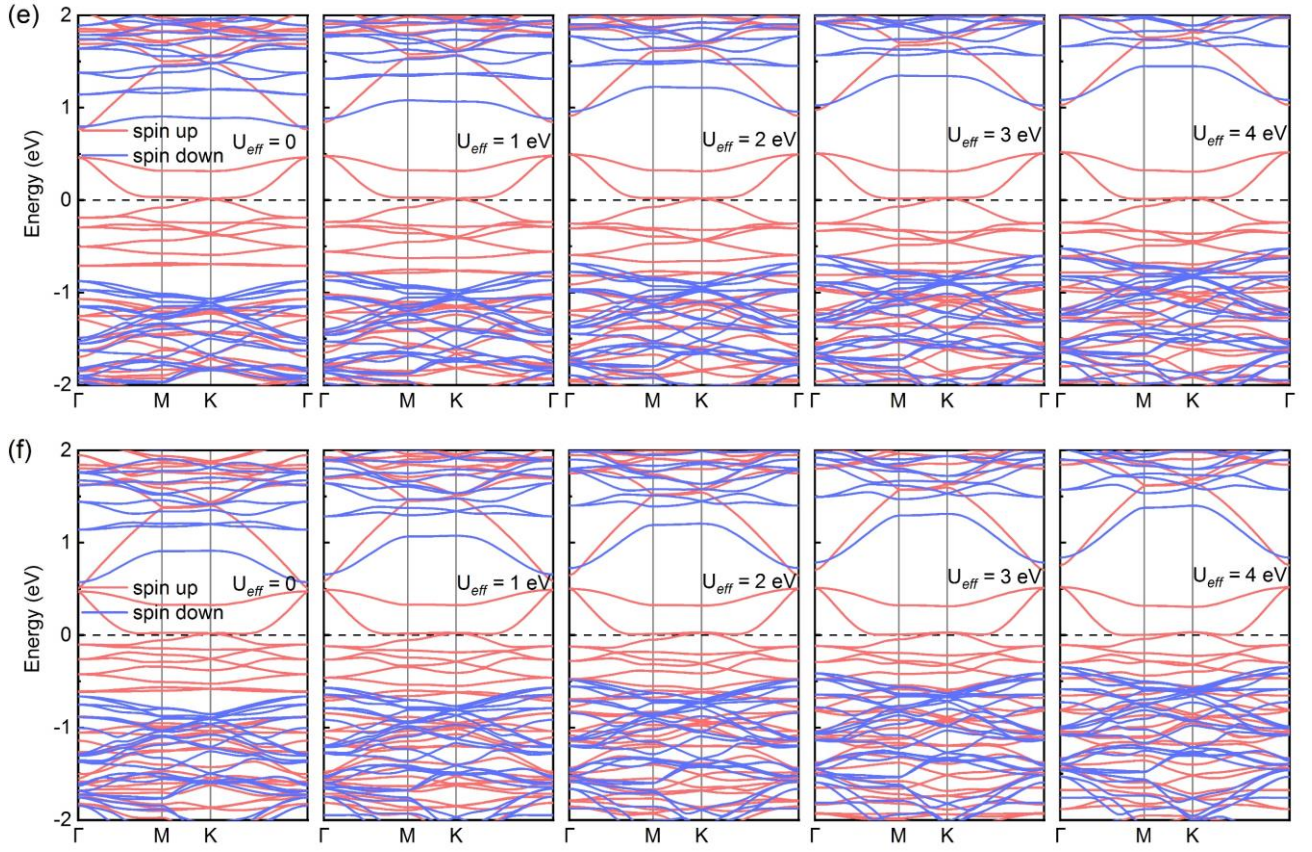

FIG. S3. Electronic band structures without SOC at different effective  $U$  ( $U_{\text{eff}}$ ) values ( $U_{\text{eff}} = 1, 2, 3, 4$  eV) of the Cr atom for (a)  $\text{Li}_{12}\text{Mg}_{10}\text{Cr}_2\text{P}_{12}$  monolayer, (b)  $\text{Li}_{12}\text{Mg}_{10}\text{Cr}_2\text{As}_{12}$  monolayer, (c)  $\text{Li}_{12}\text{Zn}_{10}\text{Cr}_2\text{P}_{12}$  monolayer, (d)  $\text{Li}_{12}\text{Zn}_{10}\text{Cr}_2\text{As}_{12}$  monolayer, (e)  $\text{Li}_{12}\text{Cd}_{10}\text{Cr}_2\text{P}_{12}$  monolayer and (f)  $\text{Li}_{12}\text{Cd}_{10}\text{Cr}_2\text{As}_{12}$  monolayer, respectively.

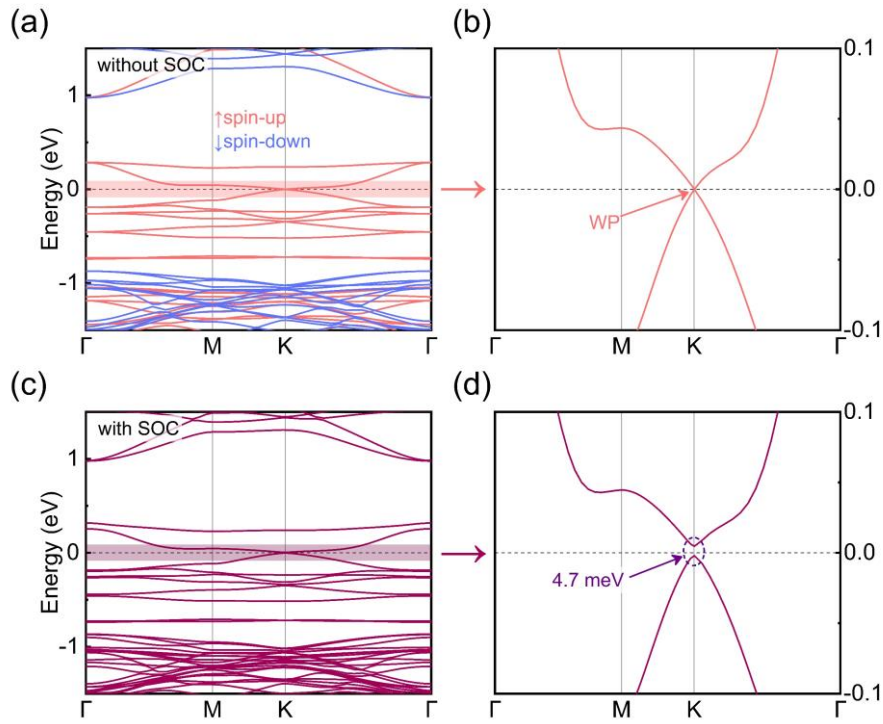

FIG. S4. Calculated electronic band structures of the  $\text{Li}_{12}\text{Mg}_{10}\text{Cr}_2\text{As}_{12}$  monolayer (a) without SOC and (c) with SOC. (b) and (d) are enlarged view around the Fermi energy level.

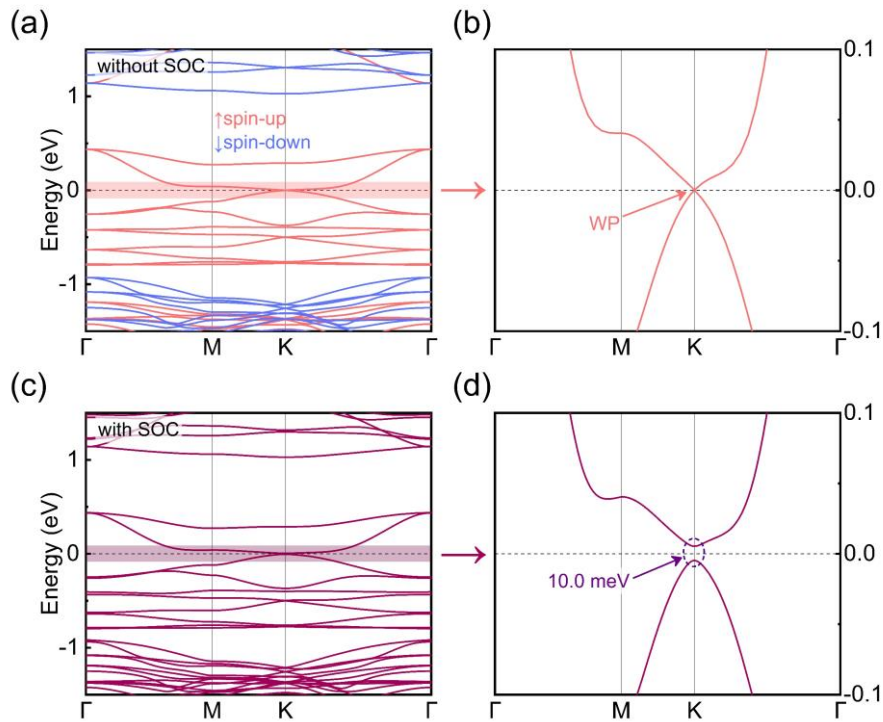

FIG. S5. Calculated electronic band structures of the  $\text{Li}_{12}\text{Zn}_{10}\text{Cr}_2\text{P}_{12}$  monolayer (a) without SOC and (c) with SOC. (b) and (d) are enlarged view around the Fermi energy level.

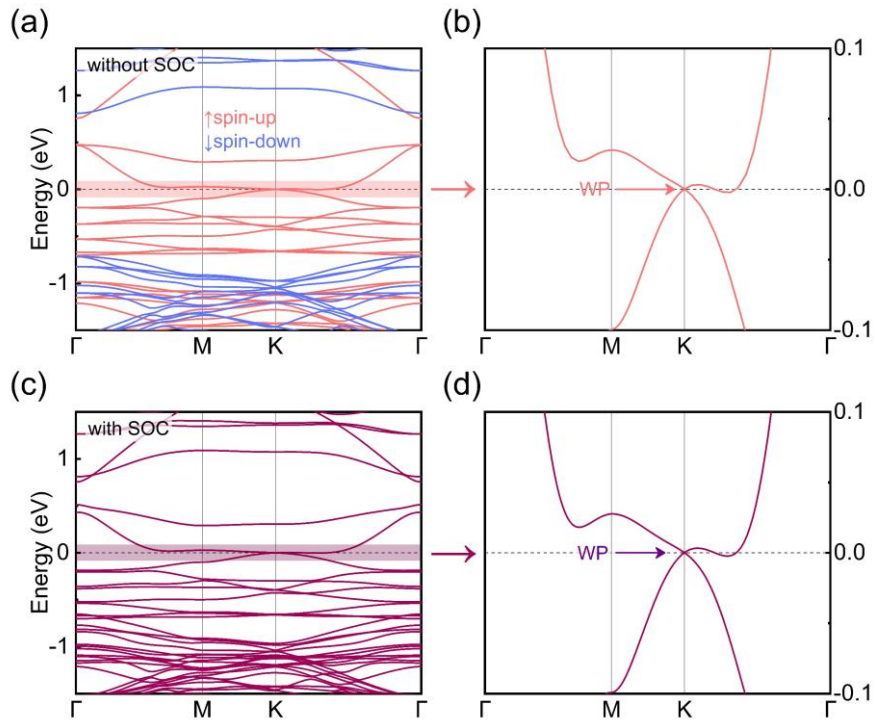

FIG. S6. Calculated electronic band structures of the  $\text{Li}_{12}\text{Zn}_{10}\text{Cr}_2\text{As}_{12}$  monolayer (a) without SOC and (c) with SOC. (b) and (d) are enlarged view around the Fermi energy level.

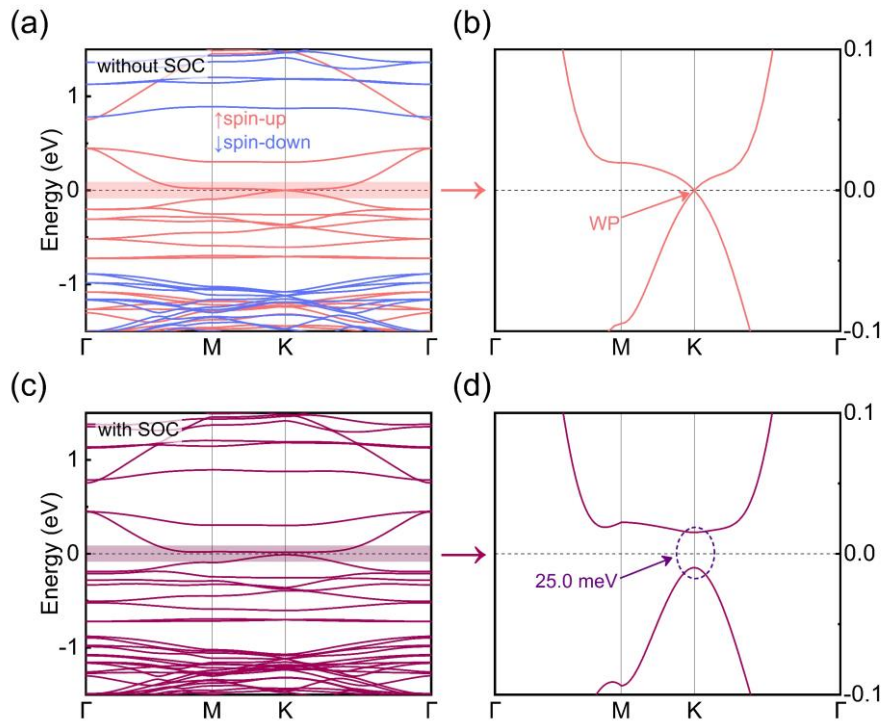

FIG. S7. Calculated electronic band structures of the  $\text{Li}_{12}\text{Cd}_{10}\text{Cr}_2\text{P}_{12}$  monolayer (a) without SOC and (c) with SOC. (b) and (d) are enlarged view around the Fermi energy level.



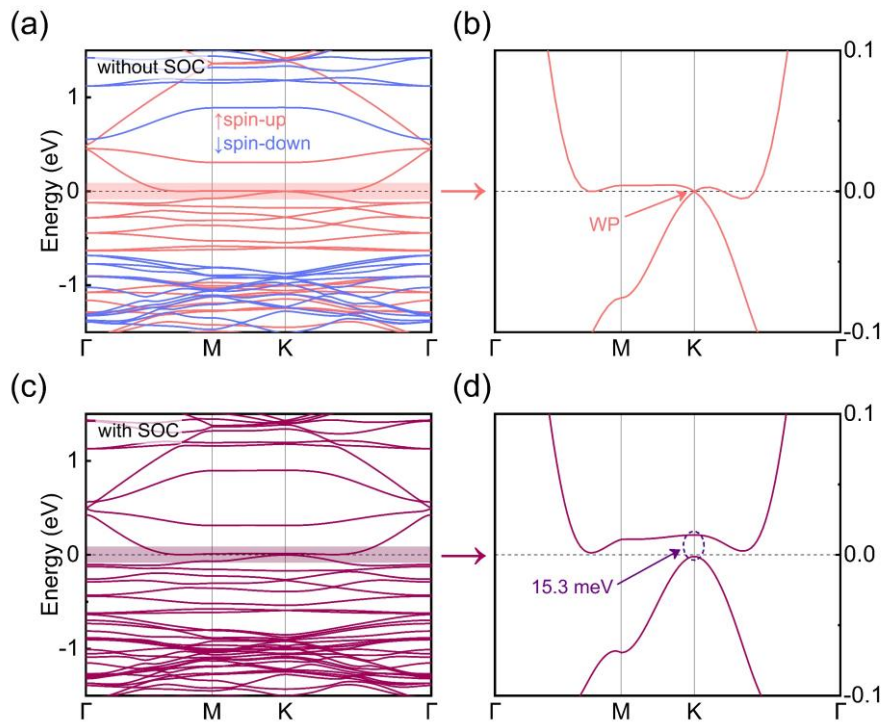

FIG. S8. Calculated electronic band structures of the  $\text{Li}_{12}\text{Cd}_{10}\text{Cr}_2\text{As}_{12}$  monolayer (a) without SOC and (c) with SOC. (b) and (d) are enlarged view around the Fermi energy level.

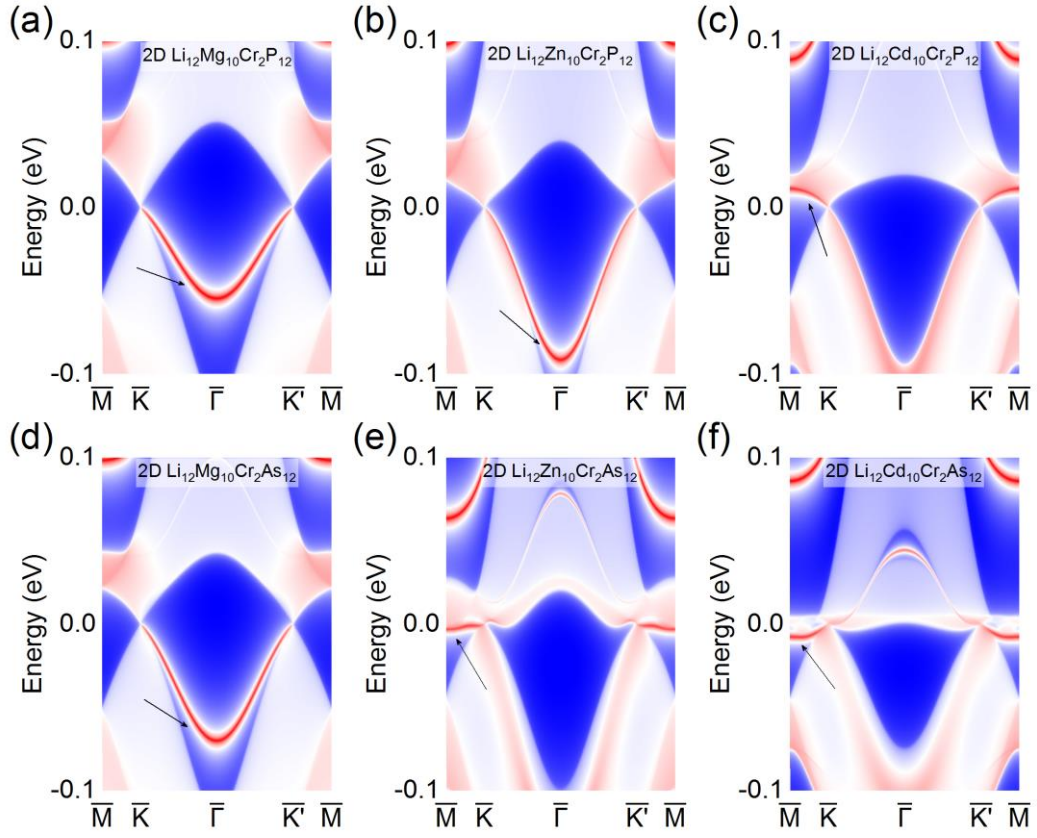

FIG. S9. Calculated The edge states along (1 0 0) surface direction without SOC of (a)  $\text{Li}_{12}\text{Mg}_{10}\text{Cr}_2\text{P}_{12}$  monolayer, (b)  $\text{Li}_{12}\text{Zn}_{10}\text{Cr}_2\text{P}_{12}$  monolayer, (c)  $\text{Li}_{12}\text{Cd}_{10}\text{Cr}_2\text{P}_{12}$  monolayer, (d)  $\text{Li}_{12}\text{Mg}_{10}\text{Cr}_2\text{As}_{12}$  monolayer, (e)  $\text{Li}_{12}\text{Zn}_{10}\text{Cr}_2\text{As}_{12}$  monolayer and (f)  $\text{Li}_{12}\text{Cd}_{10}\text{Cr}_2\text{As}_{12}$  monolayer, respectively.

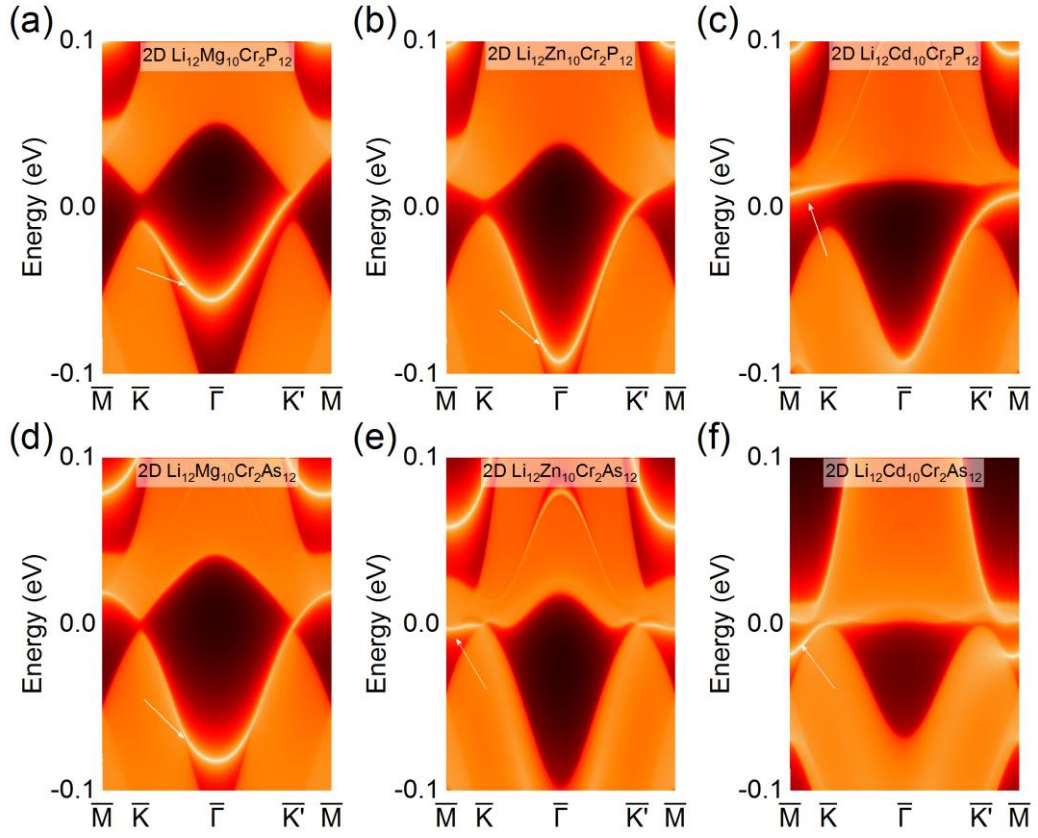

FIG. S10. Calculated The edge states along (1 0 0) surface direction with SOC of (a)  $\text{Li}_{12}\text{Mg}_{10}\text{Cr}_2\text{P}_{12}$  monolayer, (b)  $\text{Li}_{12}\text{Zn}_{10}\text{Cr}_2\text{P}_{12}$  monolayer, (c)  $\text{Li}_{12}\text{Cd}_{10}\text{Cr}_2\text{P}_{12}$  monolayer, (d)  $\text{Li}_{12}\text{Mg}_{10}\text{Cr}_2\text{As}_{12}$  monolayer, (e)  $\text{Li}_{12}\text{Zn}_{10}\text{Cr}_2\text{As}_{12}$  monolayer and (f)  $\text{Li}_{12}\text{Cd}_{10}\text{Cr}_2\text{As}_{12}$  monolayer, respectively.

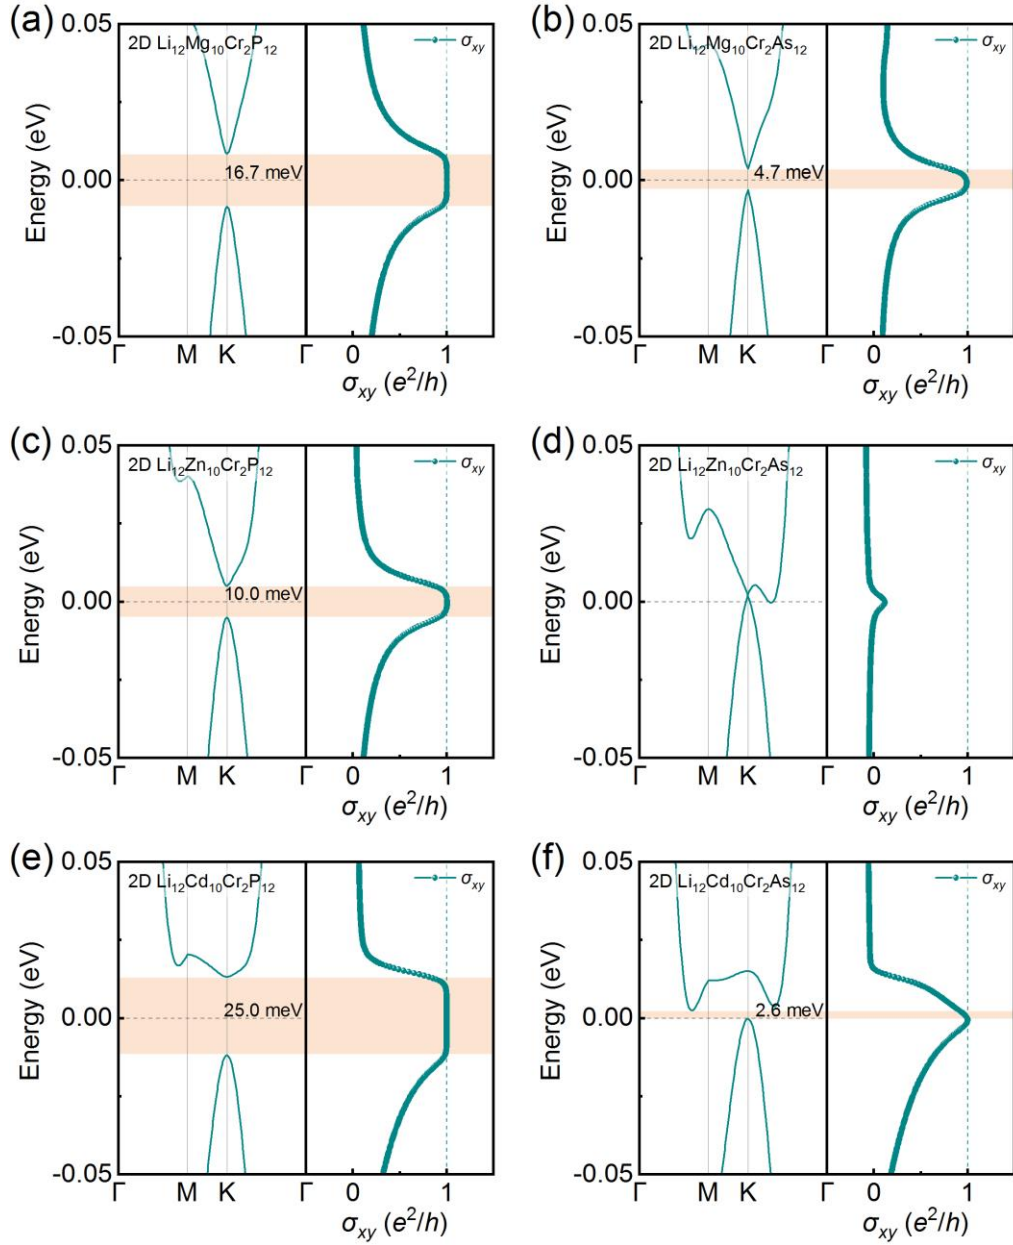

FIG. S11. Calculated band structures and anomalous Hall conductivity with SOC of (a)  $\text{Li}_{12}\text{Mg}_{10}\text{Cr}_2\text{P}_{12}$  monolayer, (b)  $\text{Li}_{12}\text{Mg}_{10}\text{Cr}_2\text{As}_{12}$  monolayer, (c)  $\text{Li}_{12}\text{Zn}_{10}\text{Cr}_2\text{P}_{12}$  monolayer, (d)  $\text{Li}_{12}\text{Zn}_{10}\text{Cr}_2\text{As}_{12}$  monolayer, (e)  $\text{Li}_{12}\text{Cd}_{10}\text{Cr}_2\text{P}_{12}$  monolayer and (f)  $\text{Li}_{12}\text{Cd}_{10}\text{Cr}_2\text{As}_{12}$  monolayer, respectively.
